# Supplementary material for: Three Novel Thiazole-Arm Containing 1,3,4-Oxadiazole-Based [HS-HS] Fe(II) Dinuclear Complexes
Source: MDPI journal article supplement (doi:10.3390/cryst12030404), 2022-03-16
Supplement: s1 [file s1]

Article

# Three Novel Thiazole-Arm Containing 1,3,4-Oxadiazole-Based [HS-HS] Fe(II) Dinuclear Complexes

Sriram Sundaresan, Julian Eppelsheimer, Luca M. Carrella and Eva Rentschler \*

Department Chemie, Johannes-Gutenberg Universität, Duesbergweg 10-14, 55128 Mainz, Germany; ssundare@uni-mainz.de (S.S.); eppelsheimer@uni-mainz.de (J.E.); carrella@uni-mainz.de (L.M.C.)

\* Correspondence: rentschler@uni-mainz.de; Tel.: +49-6131-3925491

## Electronic Supplementary Information

### Table of Contents

|                                |   |
|--------------------------------|---|
| S1. Infrared Spectra .....     | 2 |
| S2. NMR Spectroscopy .....     | 4 |
| S3. FD Mass spectroscopy ..... | 7 |
| S4. Crystallography .....      | 8 |

## S1. Infrared Spectra

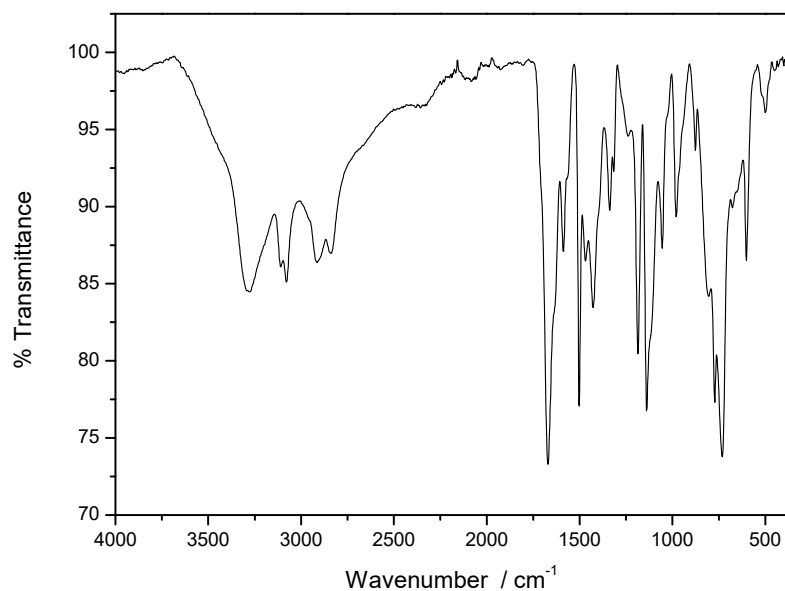

**Figure S1:** IR spectrum of 2,5-Bis[(1,3-thiazol-2-ylmethyl)amino]methyl-1,3,4-oxadiazole ( $L^{\text{Thiazole}}$ ).

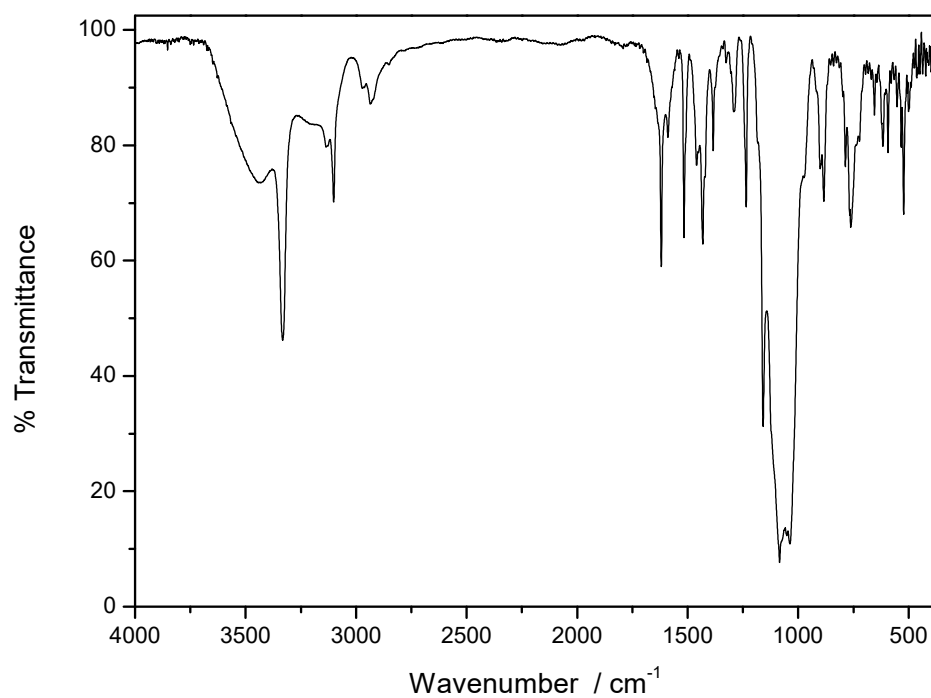

**Figure S2:** IR spectrum of  $[\text{Fe}_2(\mu_2-L^{\text{Thiazole}})_2](\text{BF}_4)_4 \cdot 2\text{MeCN}$  (**1**).

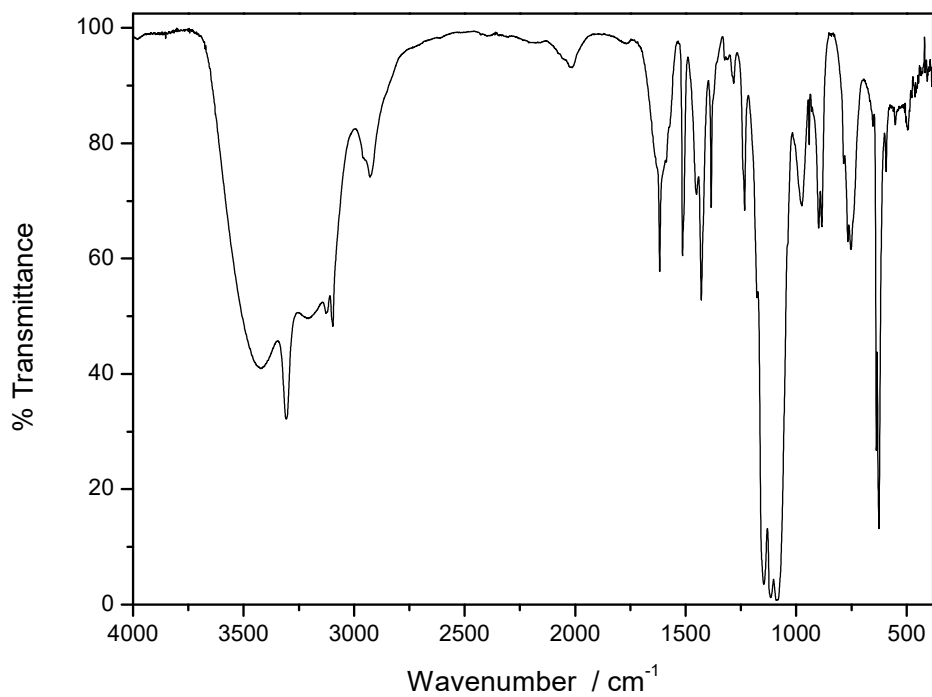

**Figure S3:** IR spectrum of  $[\text{Fe}_2(\mu_2\text{-L}^{\text{Thiazole}})_2](\text{ClO}_4)_4$  (**2**)

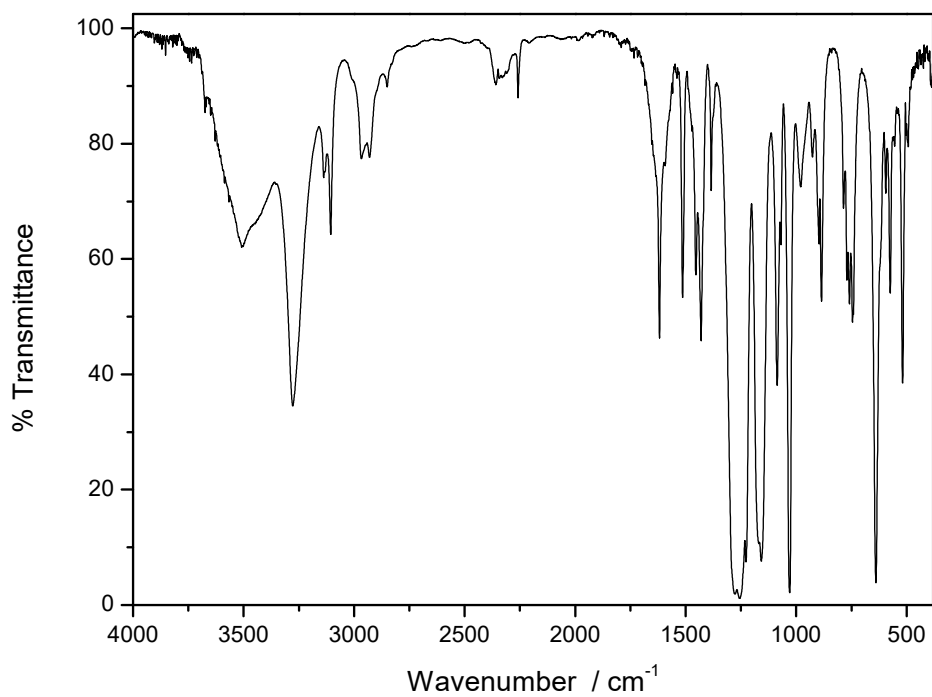

**Figure S4:** IR spectrum of  $[\text{Fe}_2(\mu_2\text{-L}^{\text{Thiazole}})_2](\text{CF}_3\text{SO}_3)_4 \cdot 2\text{MeCN}$  (**3**).

## S2. NMR Spectroscopy

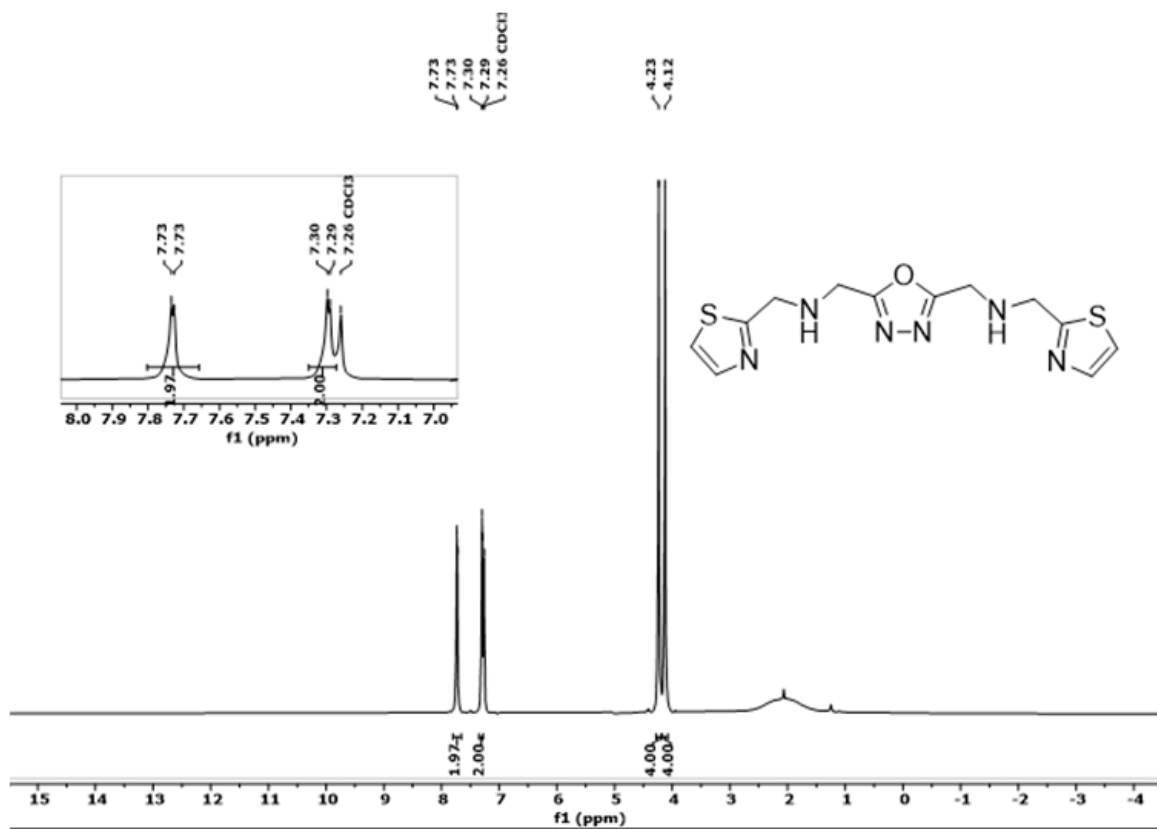

**Figure S5:**  $^1\text{H}$ -NMR spectrum of 2,5-Bis[(1,3-thiazol-2-ylmethyl)amino]methyl-1,3,4-oxadiazole ( $\text{L}^{\text{Thiazole}}$ ) in  $\text{CDCl}_3$ .

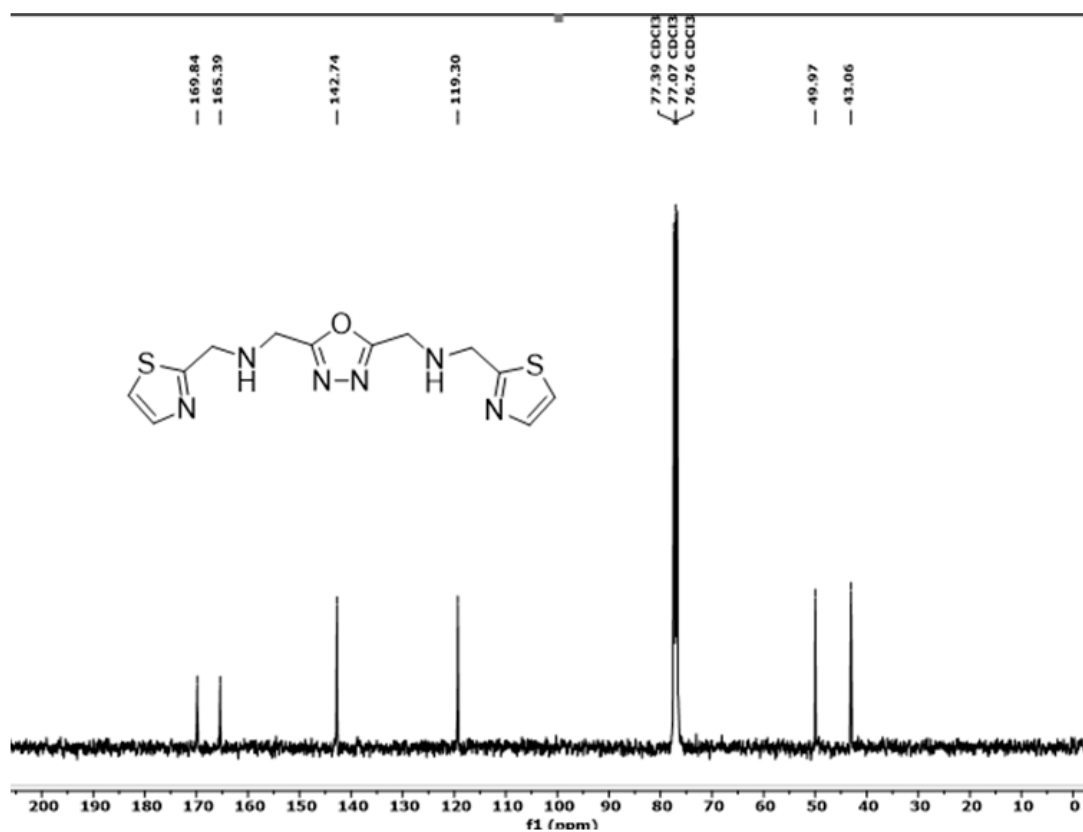

**Figure S6:**  $^{13}C$ -NMR spectrum of 2,5-Bis[(1,3-thiazol-2-ylmethyl)amino]methyl-1,3,4-oxadiazole ( $L^{Thiazole}$ ) in  $CDCl_3$ .

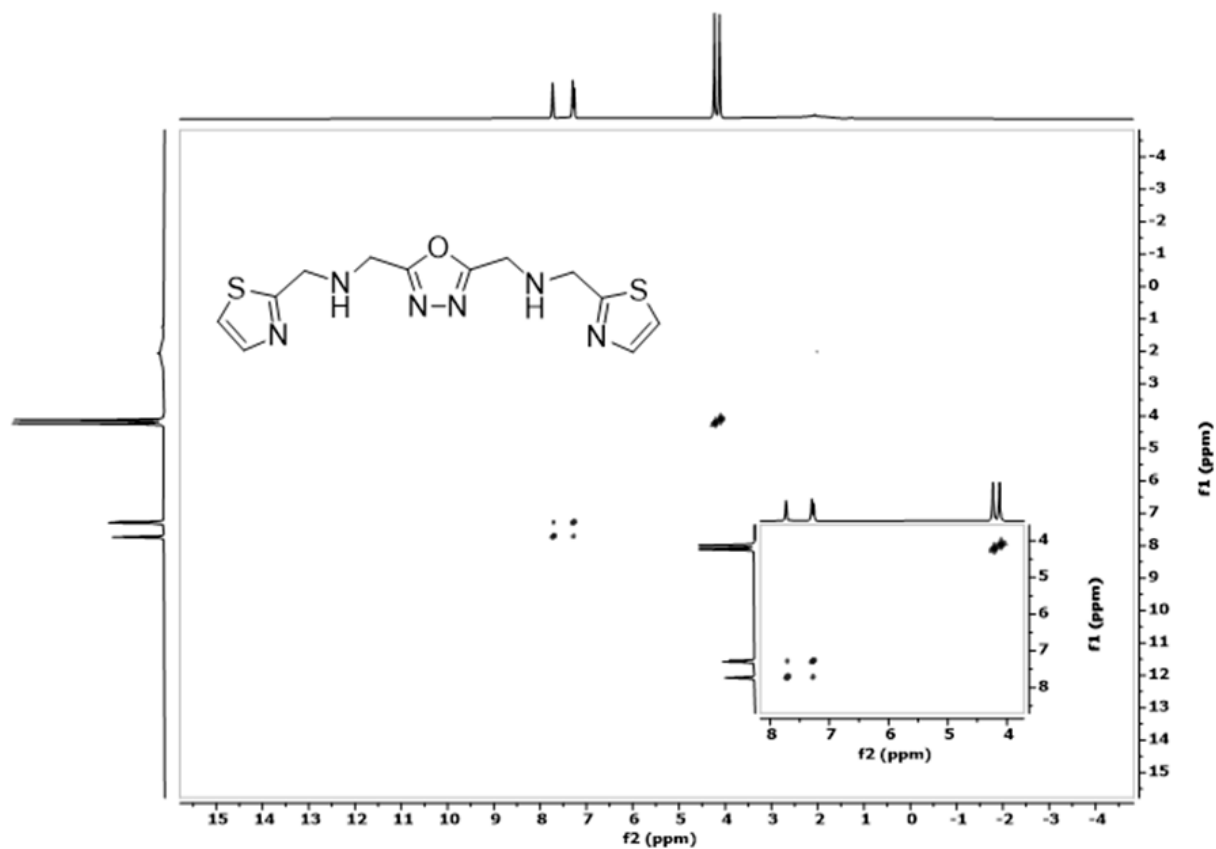

**Figure S7:**  $^1H$ - $^1H$ -COSY spectrum of 2,5-Bis[(1,3-thiazol-2-ylmethyl)amino]methyl-1,3,4-oxadiazole ( $L^{Thiazole}$ ) in  $CDCl_3$ .

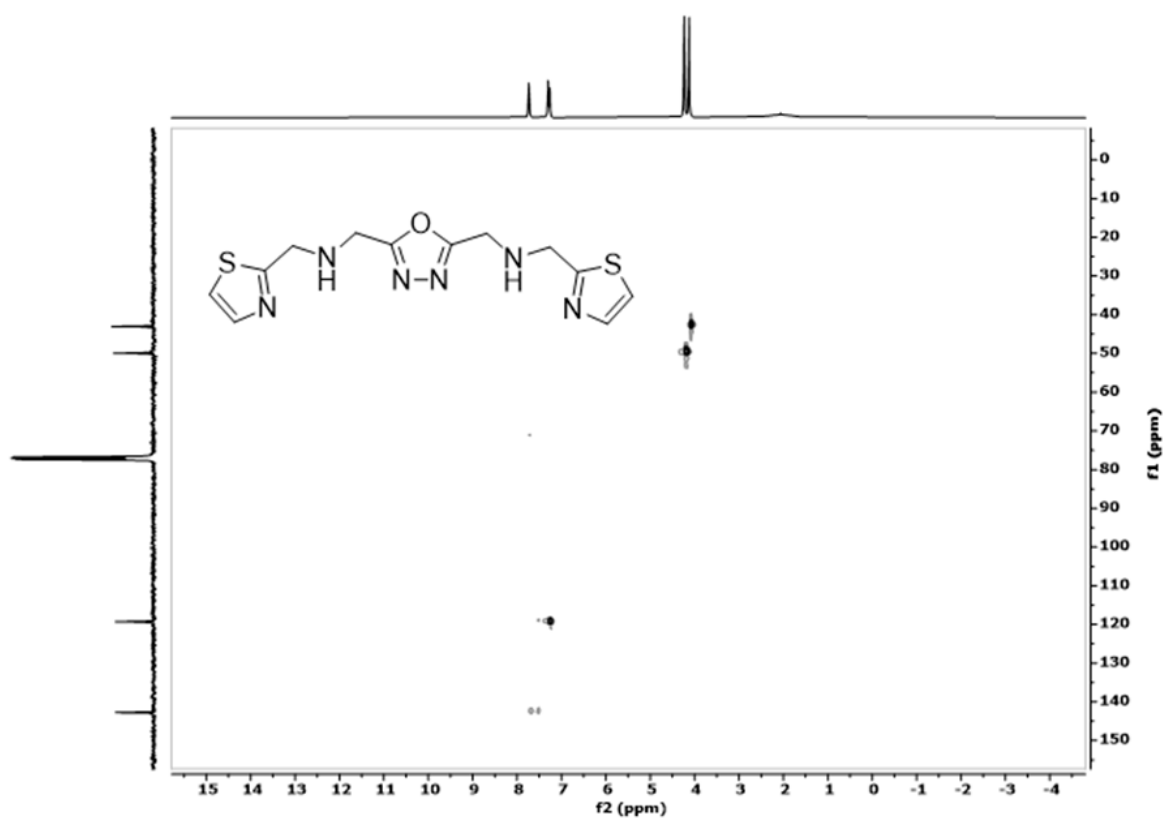

**Figure S8:**  $^1\text{H}$ - $^{13}\text{C}$ -HSQC spectrum of 2,5-Bis[(1,3-thiazol-2-ylmethyl)amino]methyl-1,3,4-oxadiazole ( $\text{L}^{5,\text{TA}}$ ) in  $\text{CDCl}_3$ .

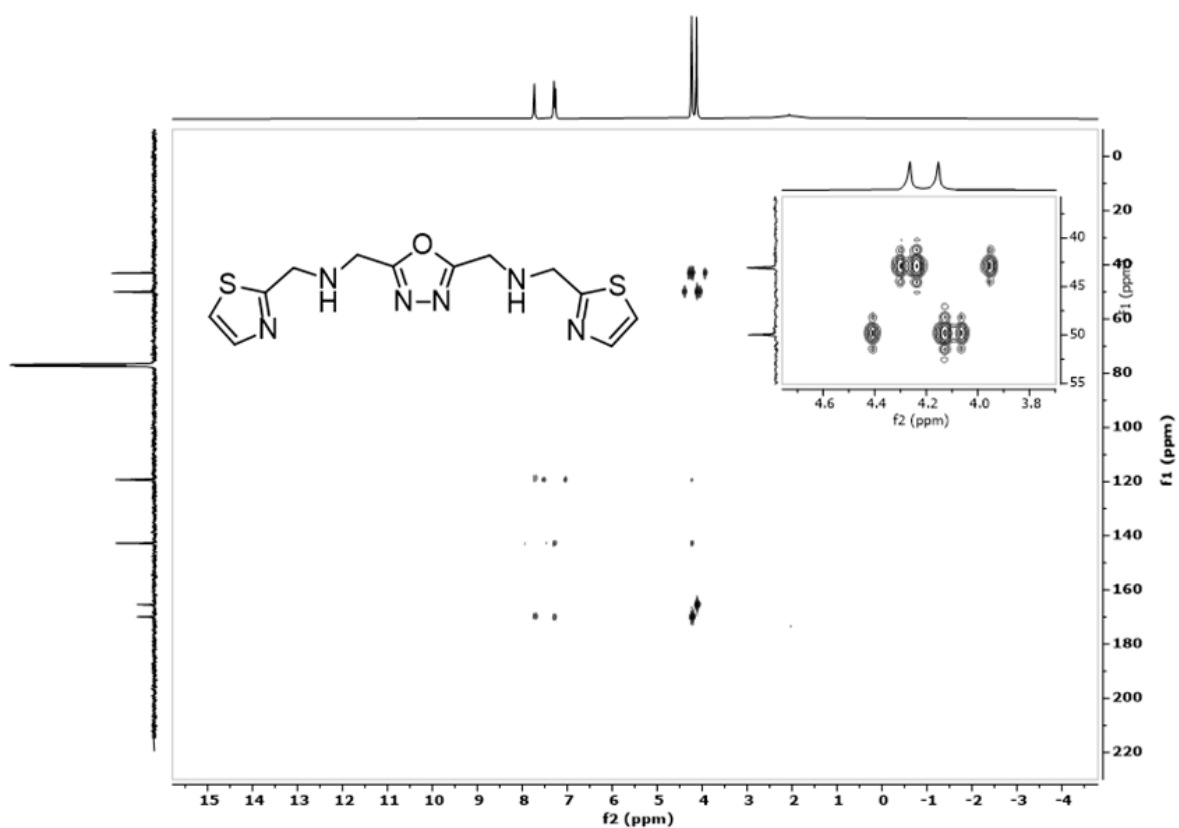

**Figure S9:**  $^1\text{H}$ - $^{13}\text{C}$ -HMBC spectrum of 2,5-Bis[(1,3-thiazol-2-ylmethyl)amino]methyl-1,3,4-oxadiazole ( $L^{5,TA}$ ) in  $\text{CDCl}_3$ .

### S3. FD Mass spectroscopy

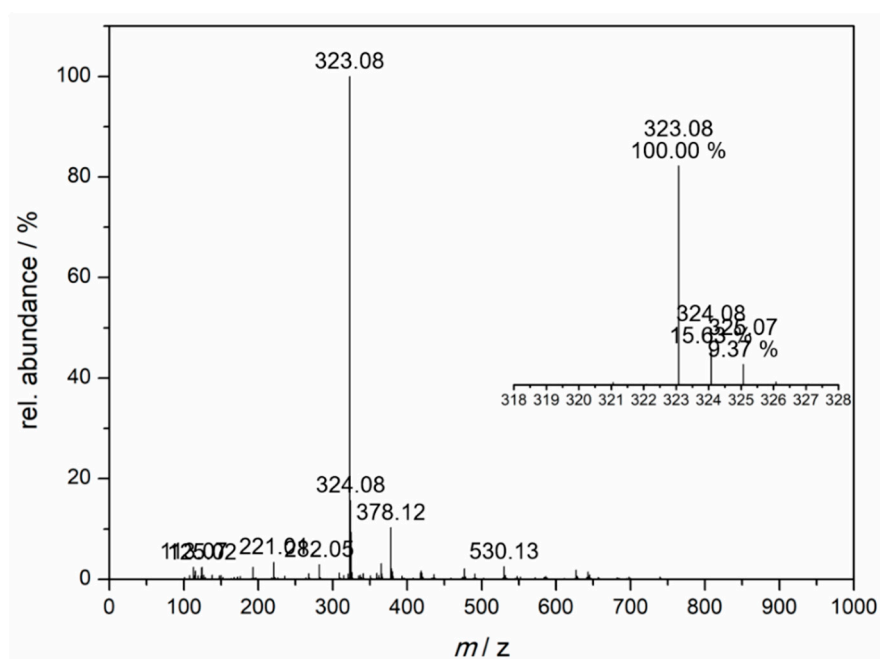

**Figure S10:** FD mass spectrum of 2,5-Bis[(1,3-thiazol-2-ylmethyl)amino]methyl-1,3,4-oxadiazole ( $L^{\text{Thiazole}}$ ).

## S4. Crystallography

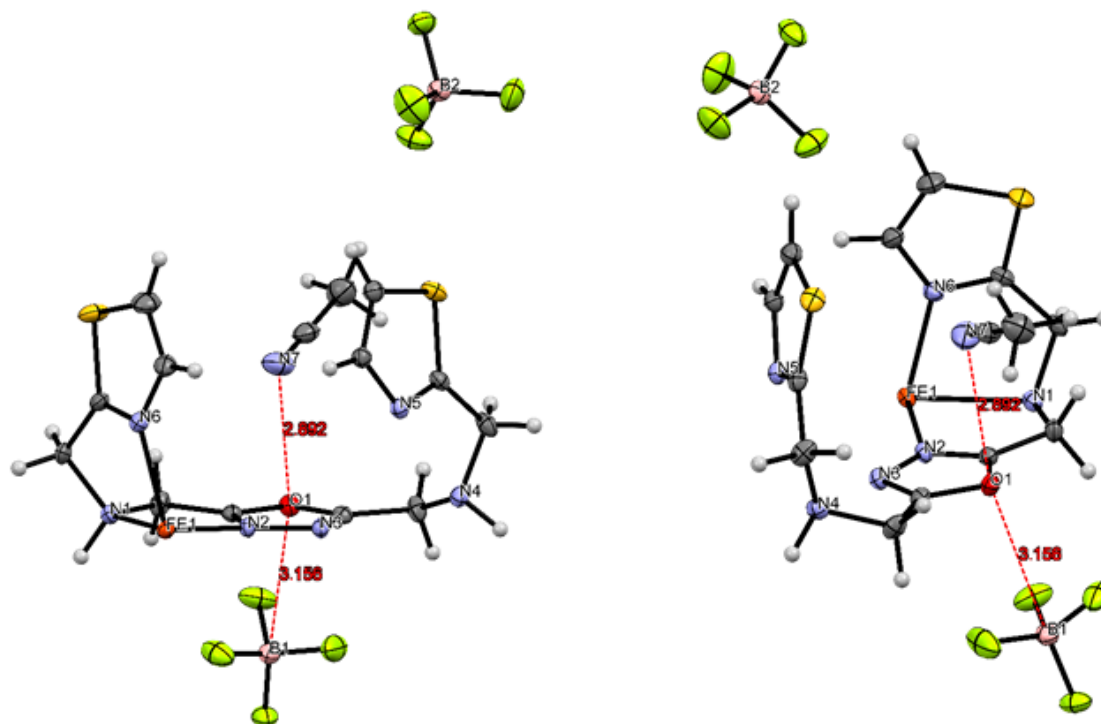

**Figure S11:** Asymmetric Unit of **1** with front view (left) and side view (right). Measured distances are displayed as red dashed lines. ORTEP representation with atomic displacement parameters set to 50 % probability.

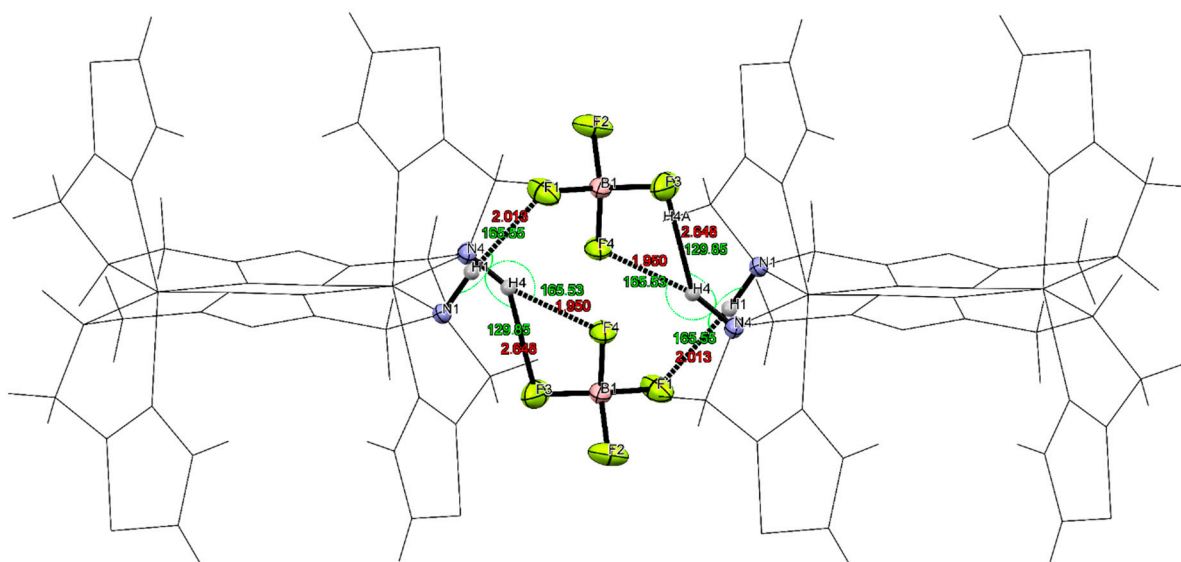

**Figure S12:** Unique hydrogen bonds (dashed black lines) in **1** between complex cations and tetrafluoroborate anions. Acetonitrile molecules and irrelevant tetrafluoroborate anions are omitted for clarity. N-H...F distances are displayed in red. N-H-F angles are shown in green. ORTEP representation with atomic displacement parameters set to 50 % probability.



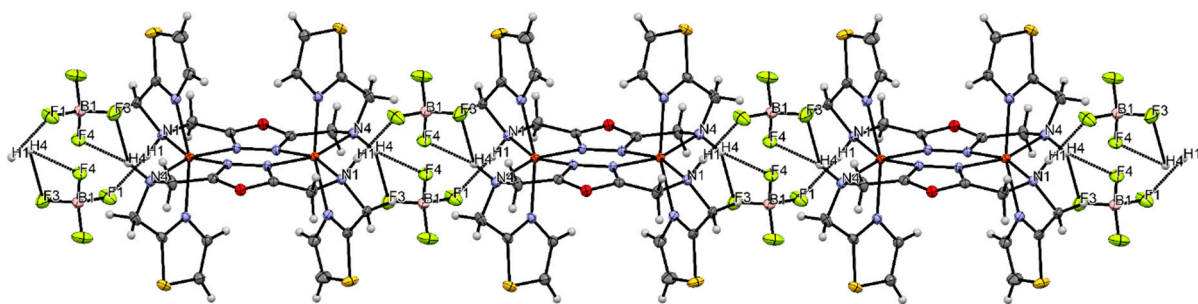

**Figure S13:** One-dimensional network of complex cations via hydrogen bonds (dashed black lines) in **1**. Acetonitrile molecules and irrelevant tetrafluoroborate anions are omitted for clarity. ORTEP representation with atomic displacement parameters set to 50 % probability.

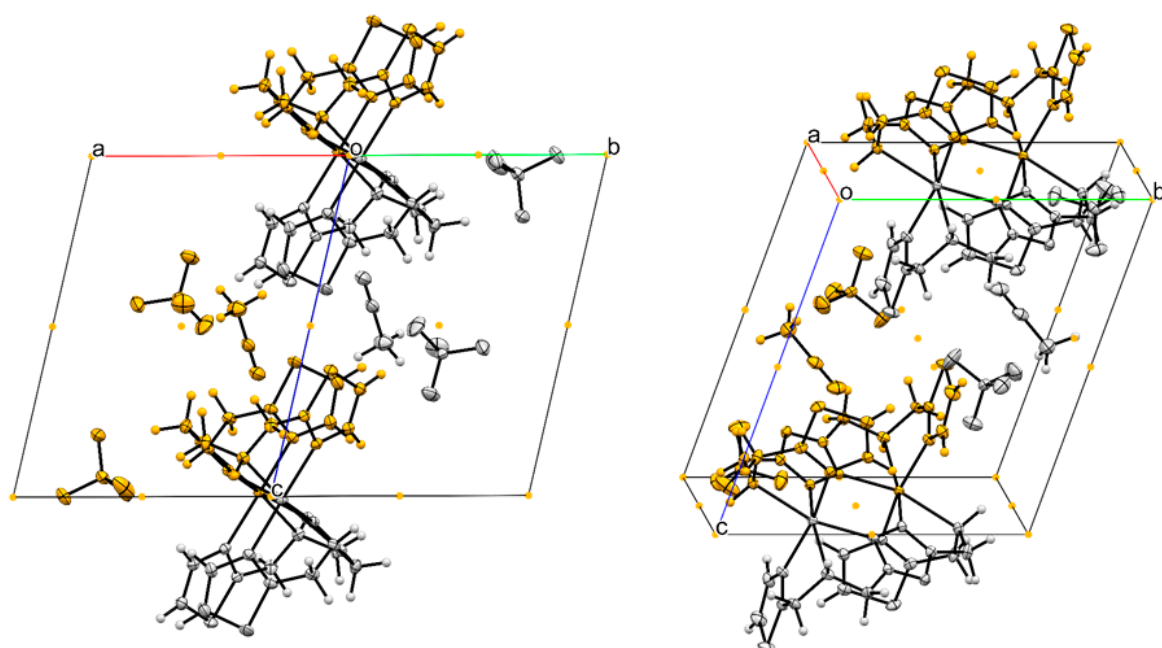

**Figure S14:** Unit cell of **1** with view along the bisector of  $\gamma$  (left) and perspective (right). The colour scheme is set according to symmetry equivalent moieties. Yellow dots represent a center of inversion. ORTEP representation with atomic displacement parameters set to 50 % probability.

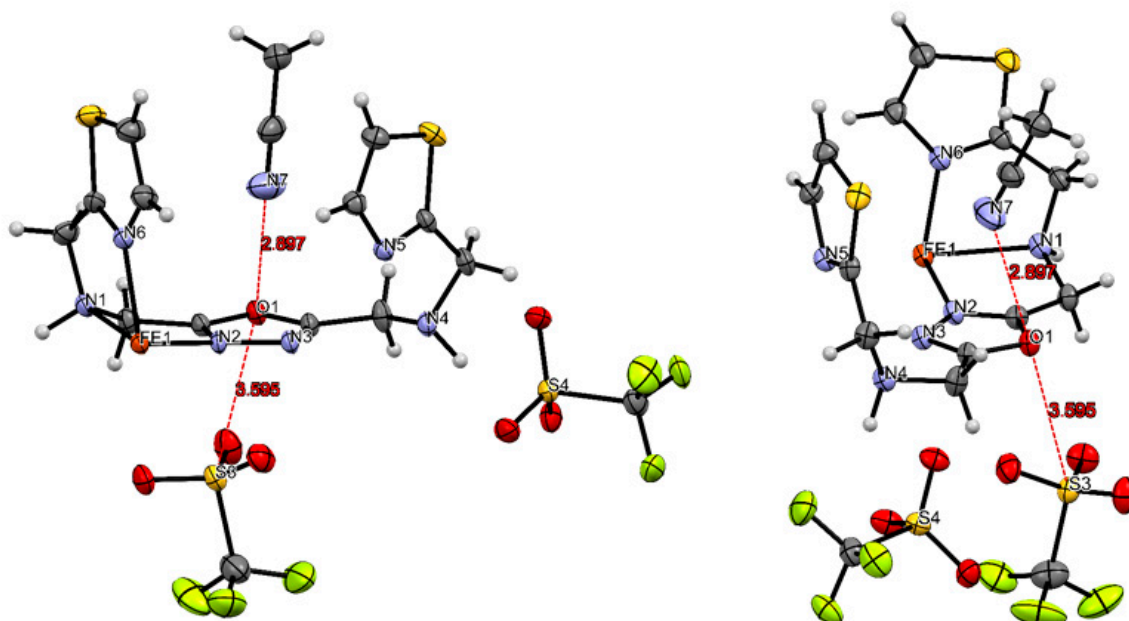

**Figure S15:** Asymmetric Unit of **3** with front view (left) and side view (right). Measured distances are displayed as red dashed lines. ORTEP representation with atomic displacement parameters set to 50 % probability.

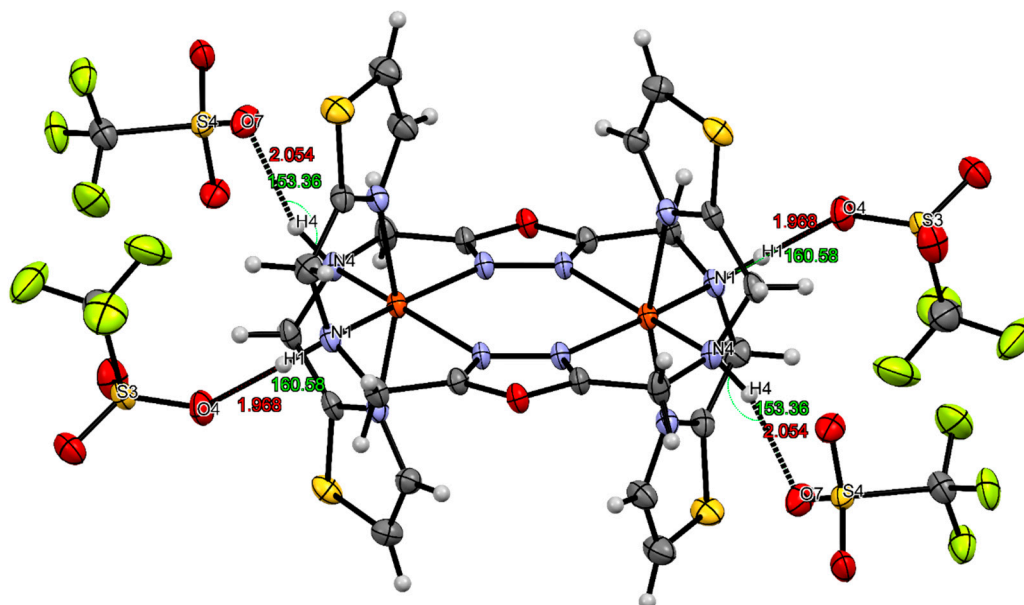

**Figure S16:** Unique hydrogen bonds (dashed black lines) in **3** between complex cations and tetrafluoroborate anions. Acetonitrile molecules and irrelevant tetrafluoroborate anions are omitted for clarity. N-H...O distances are displayed in red. N-H-O angles are shown in green. ORTEP representation with atomic displacement parameters set to 50 % probability.

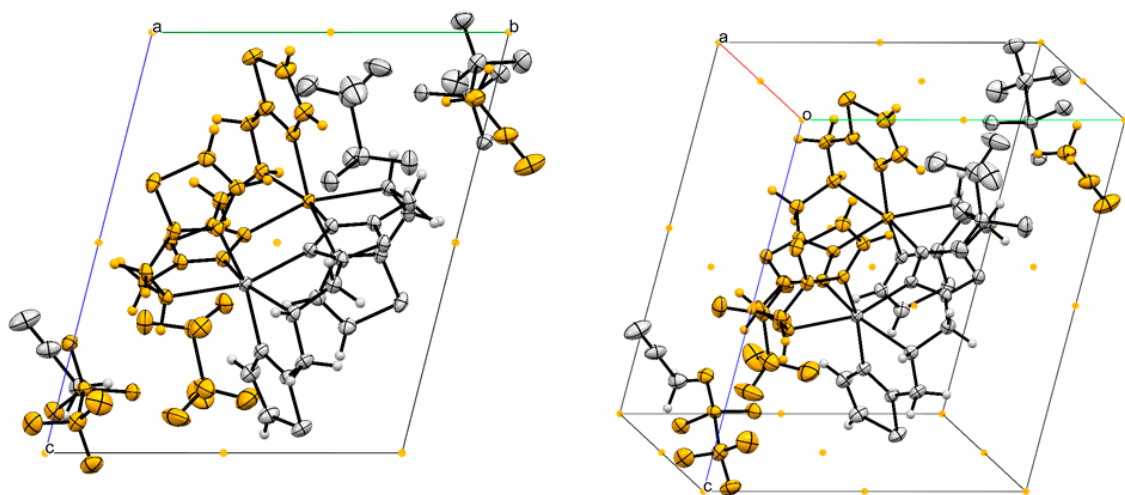

**Figure S17:** Unit cell of **3** with view along the a-axis (left) and perspective (right). The colour scheme is set according to symmetry equivalent moieties. Yellow dots represent a center of inversion. ORTEP representation with atomic displacement parameters set to 50 % probability.

**Table S1:** Selected angles of complex 1 and 3. Labeling of the atoms follows the scheme in Figure 3 (left).

|                          | <b>1</b><br>120 K | <b>3</b><br>120 K |
|--------------------------|-------------------|-------------------|
| <i>cis</i> -Angles / °   |                   |                   |
| N1-Fe-N2                 | 74.57(4)          | 74.69(10)         |
| N2-Fe-N3                 | 90.63(4)          | 90.67(10)         |
| N3-Fe-N4                 | 75.64(4)          | 74.47(10)         |
| N4-Fe-N1                 | 120.95(4)         | 122.24(10)        |
| N1-Fe-N5                 | 97.88(4)          | 96.63(10)         |
| N2-Fe-N5                 | 94.31(4)          | 92.48(11)         |
| N3-Fe-N5                 | 94.61(4)          | 95.11(11)         |
| N4-Fe-N5                 | 76.26(4)          | 76.07(10)         |
| N1-Fe-N6                 | 75.80(4)          | 75.84(11)         |
| N2-Fe-N6                 | 98.43(4)          | 101.61(11)        |
| N3-Fe-N6                 | 95.53(4)          | 96.75(11)         |
| N4-Fe-N6                 | 93.83(4)          | 93.41(11)         |
| <i>trans</i> -Angles / ° |                   |                   |
| N1-Fe-N3                 | 161.24(4)         | 161.56(10)        |
| N2-Fe-N4                 | 162.43(4)         | 160.07(11)        |
| N5-Fe-N6                 | 163.60(4)         | 161.42(11)        |
| Torsions / °             |                   |                   |
| Fe-N2-N3-Fe1'            | 9.03(18)          | 10                |
